# Supplementary material for: DNA Damage Response−Related Proteins Are Prognostic for Outcome in Both Adult and Pediatric Acute Myelogenous Leukemia Patients: Samples from Adults and from Children Enrolled in a Children’s Oncology Group Study
Source: MDPI journal article supplement (doi:10.3390/ijms24065898), 2023-03-20
Supplement: s1 [file s1]

**Supplemental Table S2.** DDR-related proteins are prognostic for overall survival in patients receiving conventional chemotherapy (CC).

| Patients receiving Conventional Chemotherapy (CC) |                                  |          |           |           |          |
|---------------------------------------------------|----------------------------------|----------|-----------|-----------|----------|
| Protein Name                                      | Overall survival stratifications |          |           |           |          |
|                                                   | Median Split                     | Terciles | Quartiles | Quintiles | Sextiles |
| XPF                                               | 0.017                            | 0.00098  | 0.00069   | 0.036     | 0.0064   |
| SSBP2                                             | 0.017                            | 0.036    | 0.058     | 0.29      | 0.089    |
| MSH6                                              | 0.016                            | 0.013    | 0.028     | 0.0034    | 0.12     |
| TP53BP1                                           | 0.0001                           | 0.0029   | 0.00022   | 0.005     | 0.0022   |
| RAD50                                             | 0.01                             | 0.19     | 0.028     | 0.21      | 0.13     |
| XRCC1                                             | 0.58                             | 0.12     | 0.15      | 0.037     | 0.25     |
| BABAM1.pS29                                       | 0.00037                          | 0.00014  | 0.00083   | 0.00049   | 0.00057  |
| CDKN1B.pT198                                      | 0.14                             | 0.0087   | 0.037     | 0.068     | 0.062    |
| AURKA                                             | 0.34                             | 0.49     | 0.047     | 0.02      | 0.003    |
| RPA32                                             | 0.0063                           | 0.0052   | 0.022     | 0.0093    | 0.0095   |
| RPA32.pS4_8                                       | 0.35                             | 0.004    | 0.065     | 0.24      | 0.022    |
