# Supplementary material for: DNA Damage Response−Related Proteins Are Prognostic for Outcome in Both Adult and Pediatric Acute Myelogenous Leukemia Patients: Samples from Adults and from Children Enrolled in a Children’s Oncology Group Study
Source: MDPI journal article supplement (doi:10.3390/ijms24065898), 2023-03-20
Supplement: s1 [file s1]

**Supplemental Table S5.** Multivariate analysis for VH clusters.

|                                               | Univariate OS<br>(N=79) |                     |         | Multivariate OS<br>(N=79) |                     |         | Univariate CRD<br>(N=51) |                     |         | Multivariate CRD<br>(N=51) |                     |         |
|-----------------------------------------------|-------------------------|---------------------|---------|---------------------------|---------------------|---------|--------------------------|---------------------|---------|----------------------------|---------------------|---------|
| Variable                                      | HR <sup>†</sup>         | 95% CI <sup>†</sup> | p-value | HR <sup>†</sup>           | 95% CI <sup>†</sup> | p-value | HR <sup>†</sup>          | 95% CI <sup>†</sup> | p-value | HR <sup>†</sup>            | 95% CI <sup>†</sup> | p-value |
| Cluster                                       |                         |                     |         |                           |                     |         |                          |                     |         |                            |                     |         |
| C1                                            | 1.00                    | —                   |         | 1.00                      | —                   |         | 1.00                     | —                   |         | 1.00                       | —                   |         |
| C2                                            | 3.21                    | 1.79, 5.75          | <0.001  | 3.87                      | 1.65, 9.07          | 0.002   | 2.26                     | 0.93, 5.49          | 0.073   | 1.59                       | 0.60, 4.24          | 0.35    |
| C3                                            | 3.99                    | 1.97, 8.07          | <0.001  | 4.79                      | 1.60, 14.4          | 0.005   | 4.28                     | 1.44, 12.7          | 0.009   | 4.51                       | 1.27, 16.0          | 0.020   |
| Age (years)                                   | 1.01                    | 0.98, 1.04          | 0.68    | 0.97                      | 0.92, 1.04          | 0.42    | 1.09                     | 1.02, 1.16          | 0.012   | 1.10                       | 1.02, 1.19          | 0.016   |
| 2nd AML                                       | 2.03                    | 1.09, 3.76          | 0.025   | 1.89                      | 0.82, 4.37          | 0.14    | 2.03                     | 0.81, 5.11          | 0.13    | 1.33                       | 0.47, 3.71          | 0.59    |
| Unfav. Cyto. Risk                             | 2.27                    | 1.33, 3.88          | 0.003   |                           |                     |         | 2.36                     | 1.07, 5.19          | 0.033   |                            |                     |         |
| Complex Kar.                                  | 3.10                    | 1.78, 5.39          | <0.001  | 0.50                      | 0.12, 2.10          | 0.34    | 3.75                     | 1.65, 8.52          | 0.002   | 2.45                       | 0.97, 6.18          | 0.057   |
| FLT3 Mut.                                     | 1.98                    | 0.85, 4.59          | 0.11    |                           |                     |         | 6.08                     | 1.43, 26.0          | 0.015   |                            |                     |         |
| IDH Mut.                                      | 0.34                    | 0.16, 0.71          | 0.004   | 0.21                      | 0.08, 0.61          | 0.004   | 0.43                     | 0.17, 1.12          | 0.084   |                            |                     |         |
| RAS Mut.                                      | 1.44                    | 0.68, 3.05          | 0.34    |                           |                     |         | 3.11                     | 1.13, 8.55          | 0.027   |                            |                     |         |
| PTPN11 Mut.                                   | 7.47                    | 2.13, 26.2          | 0.002   | 13.4                      | 2.23, 80.6          | 0.005   |                          |                     |         |                            |                     |         |
| SRSF2 Mut.                                    | 0.16                    | 0.06, 0.48          | 0.001   |                           |                     |         | 0.12                     | 0.03, 0.55          | 0.006   |                            |                     |         |
| TP53 Mut.                                     | 2.85                    | 1.55, 5.24          | <0.001  | 1.73                      | 0.43, 6.92          | 0.44    | 3.45                     | 1.43, 8.35          | 0.006   |                            |                     |         |
| † HR = Hazard Ratio, CI = Confidence Interval |                         |                     |         |                           |                     |         |                          |                     |         |                            |                     |         |
