# Supplementary material for: DNA Damage Response−Related Proteins Are Prognostic for Outcome in Both Adult and Pediatric Acute Myelogenous Leukemia Patients: Samples from Adults and from Children Enrolled in a Children’s Oncology Group Study
Source: MDPI journal article supplement (doi:10.3390/ijms24065898), 2023-03-20
Supplement: s1 [file s1]

**Supplemental Table S4.** Multivariate analysis for CC clusters.

|                   | Univariate OS<br>(N=340) |                     |                | Multivariate OS<br>(N=340) |                     |                | Univariate CRD<br>(N=223) |                     |                | Multivariate CRD<br>(N=223) |                     |              |
|-------------------|--------------------------|---------------------|----------------|----------------------------|---------------------|----------------|---------------------------|---------------------|----------------|-----------------------------|---------------------|--------------|
| Variable          | HR <sup>†</sup>          | 95% CI <sup>‡</sup> | p-value        | HR <sup>†</sup>            | 95% CI <sup>‡</sup> | p-value        | HR <sup>†</sup>           | 95% CI <sup>‡</sup> | p-value        | HR <sup>†</sup>             | 95% CI <sup>‡</sup> | p-value      |
| Cluster           |                          |                     |                |                            |                     |                |                           |                     |                |                             |                     |              |
| C1                | 1.00                     | —                   |                | 1.00                       | —                   |                | 1.00                      | —                   |                | 1.00                        | —                   |              |
| C2                | 1.33                     | 0.94, 1.88          | 0.11           | 0.68                       | 0.46, 1.00          | <b>0.048</b>   | 0.80                      | 0.45, 1.42          | 0.44           | 0.40                        | 0.20, 0.80          | <b>0.009</b> |
| C3                | 1.58                     | 1.13, 2.21          | <b>0.008</b>   | 0.96                       | 0.67, 1.37          | 0.82           | 1.44                      | 0.87, 2.38          | 0.15           | 1.09                        | 0.60, 1.96          | 0.78         |
| C4                | 2.37                     | 1.60, 3.53          | < <b>0.001</b> | 1.68                       | 1.10, 2.57          | <b>0.016</b>   | 1.69                      | 0.88, 3.22          | 0.11           | 0.95                        | 0.45, 2.01          | 0.90         |
| Age (years)       | 1.04                     | 1.03, 1.05          | < <b>0.001</b> | 1.03                       | 1.02, 1.04          | < <b>0.001</b> | 1.04                      | 1.02, 1.05          | < <b>0.001</b> | 1.03                        | 1.01, 1.05          | <b>0.005</b> |
| Males             | 1.10                     | 0.85, 1.43          | 0.48           |                            |                     |                | 1.53                      | 1.00, 2.34          | <b>0.048</b>   | 1.38                        | 0.88, 2.19          | 0.16         |
| White (race)      | 1.52                     | 1.10, 2.09          | <b>0.011</b>   |                            |                     |                | 1.02                      | 0.65, 1.60          | 0.93           |                             |                     |              |
| Asian (race)      | 0.40                     | 0.18, 0.90          | <b>0.027</b>   |                            |                     |                | 1.15                      | 0.50, 2.63          | 0.74           |                             |                     |              |
| Black (race)      | 1.16                     | 0.69, 1.95          | 0.58           |                            |                     |                | 2.08                      | 1.08, 4.02          | <b>0.028</b>   | 2.53                        | 1.20, 5.36          | <b>0.015</b> |
| 2nd AML           | 3.01                     | 2.31, 3.93          | < <b>0.001</b> | 2.13                       | 1.57, 2.87          | < <b>0.001</b> | 2.26                      | 1.47, 3.47          | < <b>0.001</b> | 1.72                        | 1.02, 2.91          | <b>0.043</b> |
| Unfav. Cyto. Risk | 2.25                     | 1.71, 2.95          | < <b>0.001</b> |                            |                     |                | 1.38                      | 0.87, 2.19          | 0.17           |                             |                     |              |
| Complex Kar.      | 2.40                     | 1.80, 3.20          | < <b>0.001</b> | 2.12                       | 1.55, 2.89          | < <b>0.001</b> | 1.95                      | 1.20, 3.15          | <b>0.007</b>   | 2.52                        | 1.36, 4.67          | <b>0.003</b> |
| -5/5q-            | 2.94                     | 2.01, 4.30          | < <b>0.001</b> |                            |                     |                | 2.55                      | 1.23, 5.30          | <b>0.012</b>   | 0.76                        | 0.28, 2.03          | 0.58         |
| -7/7q-            | 2.37                     | 1.68, 3.33          | < <b>0.001</b> | 1.44                       | 1.00, 2.06          | <b>0.049</b>   | 1.67                      | 0.81, 3.46          | 0.17           |                             |                     |              |
| t(8;21)           | 0.48                     | 0.25, 0.93          | <b>0.031</b>   | 0.50                       | 0.25, 1.00          | <b>0.050</b>   | 0.89                      | 0.43, 1.83          | 0.75           |                             |                     |              |
| Inv 16            | 0.17                     | 0.06, 0.47          | < <b>0.001</b> | 0.22                       | 0.08, 0.60          | <b>0.003</b>   | 0.31                      | 0.11, 0.85          | <b>0.023</b>   | 0.26                        | 0.08, 0.84          | <b>0.024</b> |
| Del 12            | 5.55                     | 2.44, 12.7          | < <b>0.001</b> |                            |                     |                |                           |                     |                |                             |                     |              |
| CEBPA Mut.        | 0.62                     | 0.39, 0.98          | <b>0.043</b>   |                            |                     |                | 0.73                      | 0.38, 1.43          | 0.36           |                             |                     |              |
| FLT3 Mut.         | 0.54                     | 0.37, 0.78          | <b>0.001</b>   |                            |                     |                | 0.55                      | 0.32, 0.95          | <b>0.033</b>   | 0.66                        | 0.36, 1.23          | 0.19         |
| MLL Mut.          | 2.01                     | 1.17, 3.45          | <b>0.012</b>   |                            |                     |                | 2.61                      | 1.01, 6.72          | <b>0.047</b>   |                             |                     |              |
| NPM1 Mut.         | 0.56                     | 0.38, 0.83          | <b>0.004</b>   |                            |                     |                | 0.59                      | 0.34, 1.02          | 0.061          |                             |                     |              |
| PTPN11 Mut.       | 1.80                     | 1.15, 2.79          | <b>0.009</b>   |                            |                     |                | 1.76                      | 0.87, 3.56          | 0.11           |                             |                     |              |
| RUNX1 Mut.        | 1.27                     | 0.81, 1.99          | 0.29           |                            |                     |                | 2.65                      | 1.34, 5.26          | <b>0.005</b>   |                             |                     |              |
| SRSF2 Mut.        | 1.57                     | 0.55, 4.47          | 0.40           |                            |                     |                | 49.6                      | 4.38, 560           | <b>0.002</b>   |                             |                     |              |
| TP53 Mut.         | 3.55                     | 2.49, 5.06          | < <b>0.001</b> |                            |                     |                | 2.34                      | 1.21, 4.55          | <b>0.012</b>   |                             |                     |              |
