# Supplementary material for: DNA Damage Response−Related Proteins Are Prognostic for Outcome in Both Adult and Pediatric Acute Myelogenous Leukemia Patients: Samples from Adults and from Children Enrolled in a Children’s Oncology Group Study
Source: MDPI journal article supplement (doi:10.3390/ijms24065898), 2023-03-20
Supplement: s1 [file s1]

| Variable          | Univariate OS<br>(N=810) |                     |         | Multivariate OS<br>(N=810) |                     |         | Univariate CRD<br>(N=398) |                     |         | Multivariate CRD<br>(N=398) |                     |         |
|-------------------|--------------------------|---------------------|---------|----------------------------|---------------------|---------|---------------------------|---------------------|---------|-----------------------------|---------------------|---------|
|                   | HR <sup>†</sup>          | 95% CI <sup>†</sup> | p-value | HR <sup>†</sup>            | 95% CI <sup>†</sup> | p-value | HR <sup>†</sup>           | 95% CI <sup>†</sup> | p-value | HR <sup>†</sup>             | 95% CI <sup>†</sup> | p-value |
| Cluster           |                          |                     |         |                            |                     |         |                           |                     |         |                             |                     |         |
| C1                | 1.00                     | —                   |         | 1.00                       | —                   |         | 1.00                      | —                   |         | 1.00                        | —                   |         |
| C2                | 1.08                     | 0.80, 1.44          | 0.62    | 0.51                       | 0.35, 0.75          | <0.001  | 1.23                      | 0.77, 1.95          | 0.38    | 0.84                        | 0.46, 1.55          | 0.58    |
| C3                | 1.19                     | 0.90, 1.58          | 0.22    | 0.54                       | 0.38, 0.77          | <0.001  | 1.09                      | 0.68, 1.75          | 0.72    | 0.72                        | 0.40, 1.31          | 0.28    |
| C4                | 1.18                     | 0.89, 1.56          | 0.24    | 0.59                       | 0.42, 0.84          | 0.003   | 0.90                      | 0.56, 1.45          | 0.66    | 0.68                        | 0.36, 1.26          | 0.22    |
| C5                | 1.31                     | 0.98, 1.76          | 0.070   | 0.67                       | 0.47, 0.97          | 0.035   | 1.22                      | 0.75, 1.98          | 0.43    | 0.87                        | 0.44, 1.73          | 0.69    |
| C6                | 1.74                     | 1.27, 2.37          | <0.001  | 0.60                       | 0.40, 0.89          | 0.012   | 1.44                      | 0.84, 2.48          | 0.18    | 0.72                        | 0.35, 1.49          | 0.38    |
| Age (years)       | 1.03                     | 1.03, 1.04          | <0.001  | 1.03                       | 1.02, 1.04          | <0.001  | 1.04                      | 1.03, 1.05          | <0.001  | 1.03                        | 1.01, 1.04          | <0.001  |
| White (race)      | 1.30                     | 1.06, 1.60          | 0.013   |                            |                     |         | 1.19                      | 0.84, 1.68          | 0.33    |                             |                     |         |
| Asian (race)      | 0.60                     | 0.37, 0.97          | 0.038   |                            |                     |         | 1.08                      | 0.55, 2.12          | 0.81    |                             |                     |         |
| Hispanic (race)   | 0.68                     | 0.49, 0.95          | 0.023   |                            |                     |         | 0.71                      | 0.42, 1.21          | 0.21    |                             |                     |         |
| 2nd AML           | 2.38                     | 2.01, 2.81          | <0.001  | 1.45                       | 1.16, 1.82          | 0.001   | 1.93                      | 1.44, 2.58          | <0.001  | 1.38                        | 0.92, 2.05          | 0.12    |
| Unfav. Cyto. Risk | 2.24                     | 1.89, 2.66          | <0.001  |                            |                     |         | 1.71                      | 1.27, 2.31          | <0.001  |                             |                     |         |
| Complex Kar.      | 2.44                     | 2.05, 2.91          | <0.001  | 1.78                       | 1.35, 2.35          | <0.001  | 1.95                      | 1.42, 2.68          | <0.001  | 1.80                        | 1.08, 3.01          | 0.024   |
| -5/5q-            | 2.54                     | 2.07, 3.12          | <0.001  |                            |                     |         | 2.35                      | 1.60, 3.45          | <0.001  |                             |                     |         |
| -7/7q-            | 2.24                     | 1.84, 2.74          | <0.001  |                            |                     |         | 2.02                      | 1.36, 3.01          | <0.001  |                             |                     |         |
| t(8;21)           | 0.38                     | 0.20, 0.72          | 0.003   |                            |                     |         | 0.68                      | 0.34, 1.39          | 0.29    |                             |                     |         |
| Inv 16            | 0.12                     | 0.04, 0.32          | <0.001  |                            |                     |         | 0.25                      | 0.09, 0.67          | 0.006   |                             |                     |         |
| Del 12            | 2.34                     | 1.57, 3.48          | <0.001  |                            |                     |         | 2.33                      | 0.96, 5.68          | 0.062   |                             |                     |         |
| Trisomy 6         | 2.27                     | 1.28, 4.02          | 0.005   |                            |                     |         | 1.08                      | 0.27, 4.37          | 0.91    |                             |                     |         |
| t(11q23)          | 0.97                     | 0.55, 1.71          | 0.91    |                            |                     |         | 2.23                      | 1.04, 4.75          | 0.038   |                             |                     |         |
| CEBPA Mut.        | 0.54                     | 0.39, 0.75          | <0.001  | 0.75                       | 0.53, 1.07          | 0.11    | 0.84                      | 0.53, 1.33          | 0.46    |                             |                     |         |
| FLT3 Mut.         | 0.67                     | 0.53, 0.85          | <0.001  |                            |                     |         | 0.71                      | 0.49, 1.02          | 0.067   |                             |                     |         |
| DNMT3 Mut.        | 0.77                     | 0.62, 0.96          | 0.022   |                            |                     |         | 0.96                      | 0.68, 1.36          | 0.82    |                             |                     |         |
| KIT Mut.          | 0.51                     | 0.29, 0.91          | 0.023   | 0.68                       | 0.36, 1.29          | 0.23    | 0.69                      | 0.31, 1.56          | 0.37    |                             |                     |         |
| RUNX1 Mut.        | 1.24                     | 0.96, 1.60          | 0.11    |                            |                     |         | 1.89                      | 1.19, 3.00          | 0.007   | 1.76                        | 1.05, 2.95          | 0.032   |
| IDH2 Mut.         | 0.64                     | 0.49, 0.84          | 0.001   | 0.79                       | 0.57, 1.09          | 0.15    | 0.65                      | 0.41, 1.01          | 0.057   |                             |                     |         |
| JAK2 Mut.         | 1.97                     | 1.37, 2.84          | <0.001  |                            |                     |         | 1.61                      | 0.75, 3.42          | 0.22    |                             |                     |         |
| NPM1 Mut.         | 0.58                     | 0.45, 0.75          | <0.001  | 0.72                       | 0.52, 0.98          | 0.039   | 0.47                      | 0.31, 0.70          | <0.001  | 0.51                        | 0.29, 0.90          | 0.021   |
| SRSF2 Mut.        | 0.51                     | 0.31, 0.84          | 0.008   |                            |                     |         | 0.60                      | 0.27, 1.35          | 0.22    |                             |                     |         |
| TP53 Mut.         | 2.89                     | 2.37, 3.53          | <0.001  | 1.44                       | 1.07, 1.95          | 0.017   | 2.62                      | 1.83, 3.77          | <0.001  | 1.30                        | 0.73, 2.32          | 0.37    |
