# Supplementary material for: DNA Damage Response−Related Proteins Are Prognostic for Outcome in Both Adult and Pediatric Acute Myelogenous Leukemia Patients: Samples from Adults and from Children Enrolled in a Children’s Oncology Group Study
Source: MDPI journal article supplement (doi:10.3390/ijms24065898), 2023-03-20
Supplement: s1 [file s1]

**Supplemental Table S3.** DDR-related proteins are prognostic for overall survival in patients receiving venetoclax + HMA therapy (VH).

| Patients receiving venetoclax plus hypomethylating agent (HMA) therapy (VH) |                                  |          |           |           |          |
|-----------------------------------------------------------------------------|----------------------------------|----------|-----------|-----------|----------|
| Protein Name                                                                | Overall survival stratifications |          |           |           |          |
|                                                                             | Median Split                     | Terciles | Quartiles | Quintiles | Sextiles |
| SSBP2                                                                       | 0.026                            | 0.18     | 0.16      | 0.074     | 0.19     |
| MSH6                                                                        | 0.62                             | 0.2      | 0.022     | 0.45      | 0.2      |
| TP53BP1                                                                     | 0.038                            | 0.38     | 0.18      | 0.4       | 0.29     |
| RAD51                                                                       | 0.022                            | 0.24     | 0.077     | 0.21      | 0.2      |
| CHEK2                                                                       | 0.0013                           | 0.058    | 0.011     | 0.014     | 0.026    |
| SIRT6                                                                       | 0.021                            | 0.23     | 0.15      | 0.076     | 0.27     |
| PDCD1                                                                       | 0.033                            | 0.082    | 0.2       | 0.17      | 0.076    |
| TP53                                                                        | 0.81                             | 0.2      | 0.79      | 0.78      | 0.029    |
| CDK1                                                                        | 0.43                             | 0.13     | 0.038     | 0.18      | 0.38     |
| CDK1_2_3.pT14                                                               | 0.0098                           | 0.0078   | 0.049     | 0.02      | 0.055    |
| CDK9                                                                        | 0.041                            | 0.0052   | 0.14      | 0.071     | 0.038    |
| CDKN1B                                                                      | 0.0001                           | 0.0001   | 0.0001    | 0.0001    | 0.00016  |
| CDKN1B.pS10                                                                 | 0.0005                           | 0.00016  | 0.00023   | 0.00044   | 0.0001   |
| CDKN1B.pT198                                                                | 0.0038                           | 0.03     | 0.028     | 0.12      | 0.085    |
| RPA32.pS4_8                                                                 | 0.026                            | 0.092    | 0.12      | 0.14      | 0.25     |
